# Supplementary material
Source: PubMed Central journal article supplement (PMC1199541)

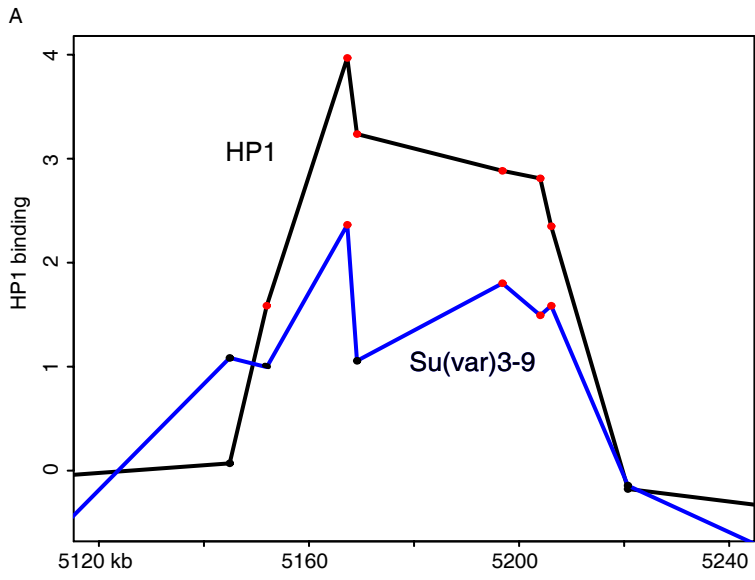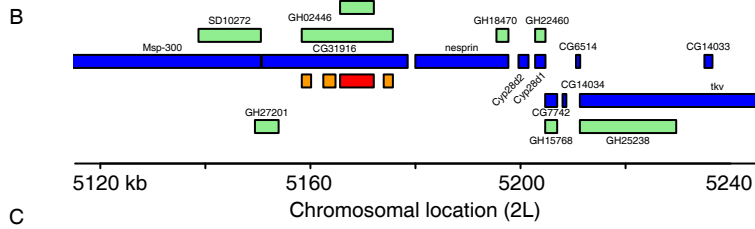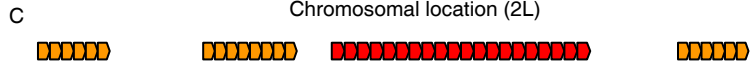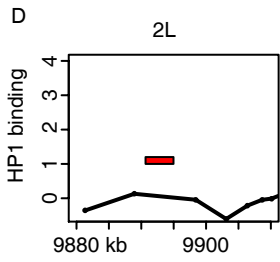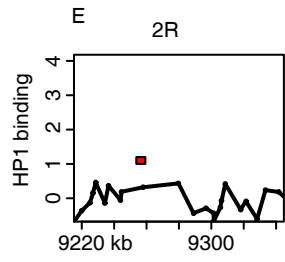

Chromosomal location

Supplement: genores_gr.3198905_1.pdf [file genores_gr.3198905_1.pdf]

A

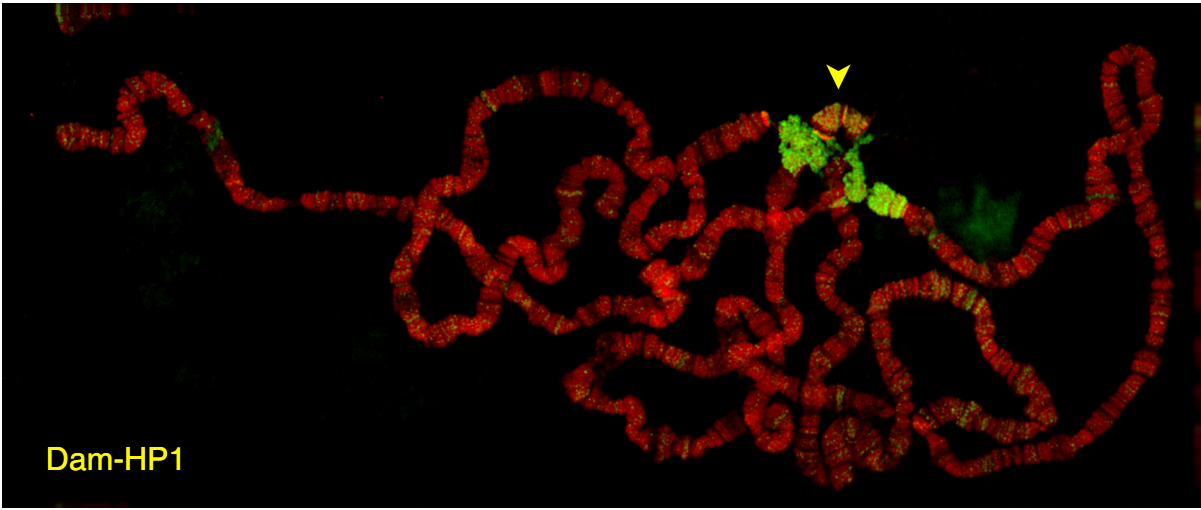

B

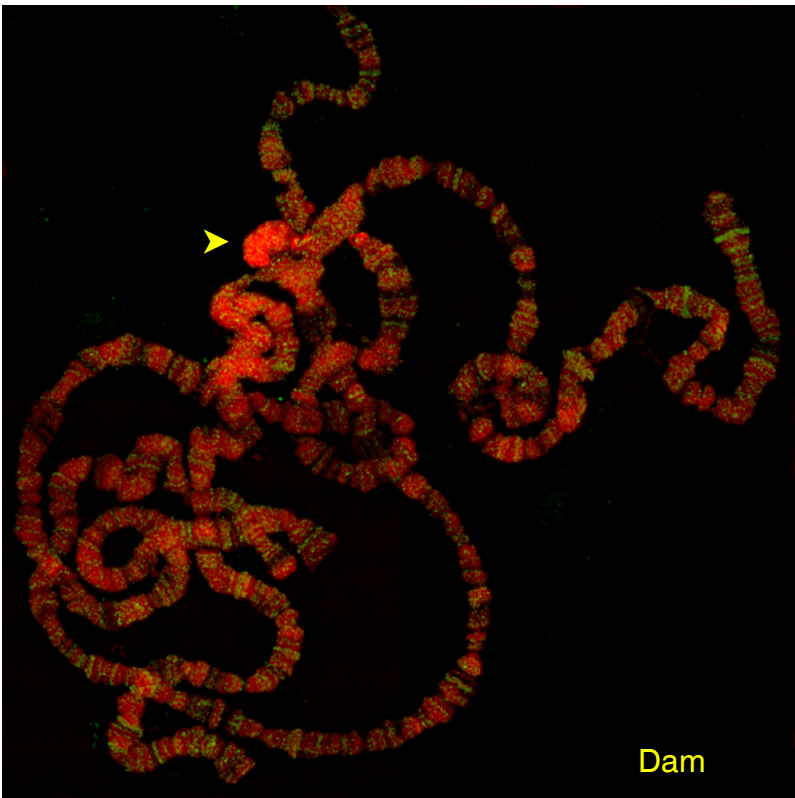

Supplement: genores_gr.3198905_2.pdf [file genores_gr.3198905_2.pdf]

A

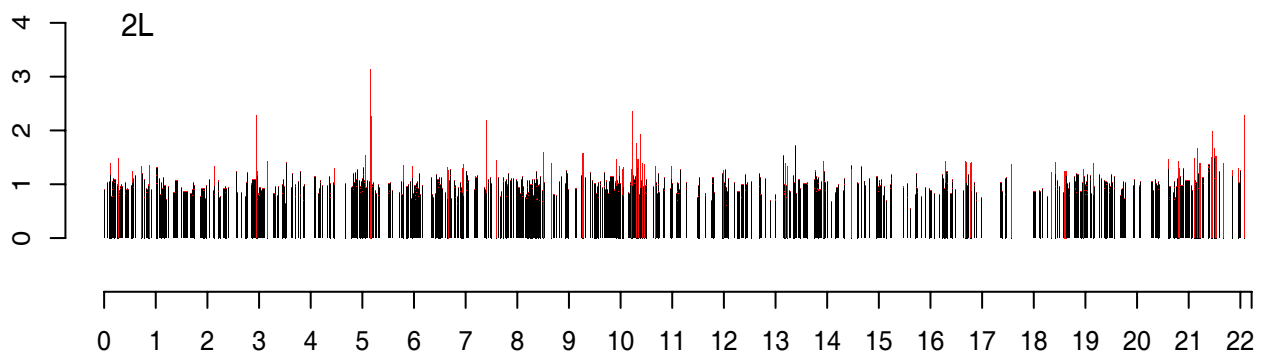

B

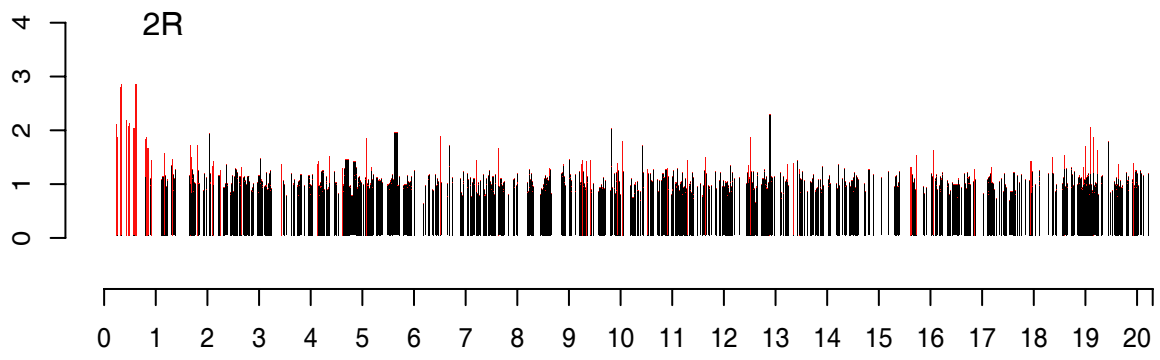

Supplement: genores_gr.3198905_3.pdf [file genores_gr.3198905_3.pdf]

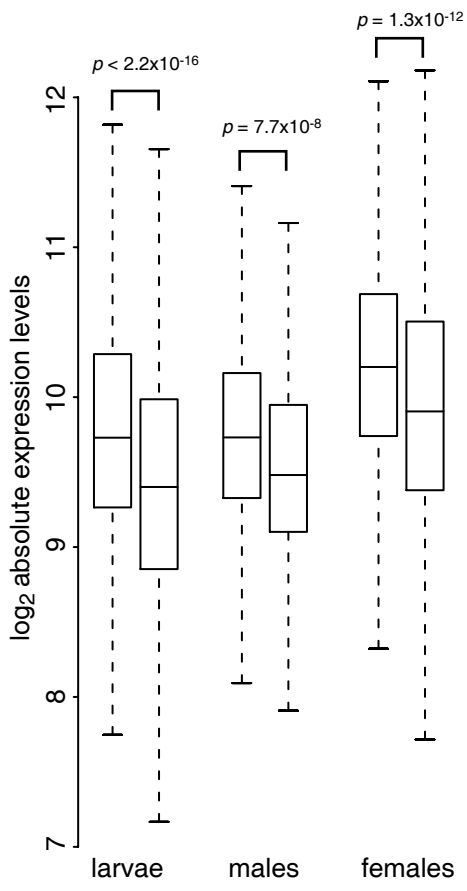

Supplement: genores_gr.3198905_4.pdf [file genores_gr.3198905_4.pdf]
